# Supplementary material for: Mechanical and electrical properties of high performance MWCNT/polycarbonate composites prepared by an industrial viable twin screw extruder with back flow channel
Source: Royal Society of Chemistry journal article supplement (doi:10.1039/c4ra11319e), 2014-11-19
Supplement: c4ra11319e1.pdf [file c4ra11319e1.pdf]

### Supplementary Information

#### **Mechanical and Electrical Properties of High Performance MWCNT/Polycarbonate Composites Prepared by Industrial Viable Twin Screw Extruder with Back Flow Channel**

Arun Babal<sup>1#</sup>, Ravi Gupta<sup>1#</sup>, B. P. Singh<sup>1\*</sup>, V.N. Singh<sup>1</sup>, R.B. Mathur<sup>1</sup>

<sup>1</sup>Physics and Engineering of Carbon, CSIR-National Physical Laboratory, Dr. K. S. Krishnan Road, New Delhi –110 012 (India)

<sup>2</sup>Electron & Ion Microscopy Section, CSIR-National Physical Laboratory, Dr. K. S. Krishnan Road, New Delhi –110 012 (India)

**Table S1:** Tensile parameters of MWCNT/PC composites.

| Sample      | Elastic modulus | Tensile strength    | Elongation       |
|-------------|-----------------|---------------------|------------------|
|             | $E_t$ (MPa)     | $\sigma_{tm}$ (MPa) | (%)              |
| Pristine PC | $1376 \pm 50$   | $66.6 \pm 0.83$     | $75.2 \pm 6$     |
| PC/0.5CNT   | $1420 \pm 31$   | $69.87 \pm 0.97$    | $72.05 \pm 9.4$  |
| PC/1CNT     | $1498 \pm 50$   | $73.84 \pm 1.07$    | $66.72 \pm 7.26$ |
| PC/2CNT     | $1574 \pm 37$   | $79.6 \pm 0.83$     | $47.64 \pm 7.82$ |
| PC/5CNT     | $1579 \pm 33$   | $72.15 \pm 1.6$     | $38.0 \pm 6.72$  |
| PC/10CNT    | $1587 \pm 52$   | $71.83 \pm 1.7$     | $25.55 \pm 8$    |

**Table S2:** Flexural parameters of MWCNT/PC composites.

| Sample      | Flexural Modulus | Flexural Strength   | Flexural Strain     |
|-------------|------------------|---------------------|---------------------|
|             | $E_f$ (MPa)      | $\sigma_{fm}$ (MPa) | $\epsilon_{fm}$ (%) |
| Pristine PC | $2143 \pm 53$    | $96.0 \pm 3$        | $8.3 \pm 0.5$       |
| PC/0.5CNT   | $2234 \pm 41$    | $99.0 \pm 2$        | $8.1 \pm 0.4$       |
| PC/1CNT     | $2302 \pm 51$    | $103.4 \pm 2$       | $7.9 \pm 0.5$       |
| PC/2CNT     | $2398 \pm 50$    | $110.0 \pm 3$       | $7.8 \pm 0.2$       |
| PC/5CNT     | $2401 \pm 34$    | $107.0 \pm 1$       | $7.6 \pm 0.2$       |
| PC/10CNT    | $2419 \pm 40$    | $106.5 \pm 2$       | $6.4 \pm 0.3$       |

**Table S3:** Electrical conductivity parameters for different composite samples.

| <b>Wt. % of MWCNT</b>    | <b>Electrical Conductivity</b> | <b>Log(<math>\sigma</math>)</b> |
|--------------------------|--------------------------------|---------------------------------|
| <b>Pure PC</b>           | <b>8.6 X10<sup>-15</sup></b>   | <b>-14.06</b>                   |
| <b>0.5 wt.% MWCNT/PC</b> | <b>1.2X10<sup>-14</sup></b>    | <b>-13.90</b>                   |
| <b>1 wt.% MWCNT/PC</b>   | <b>1.4X10<sup>-13</sup></b>    | <b>-12.85</b>                   |
| <b>2 wt.% MWCNT/PC</b>   | <b>7.9X10<sup>-6</sup></b>     | <b>-5.10</b>                    |
| <b>5 wt.% MWCNT/PC</b>   | <b>3.5X10<sup>-3</sup></b>     | <b>-2.45</b>                    |
| <b>10 wt.% MWCNT/PC</b>  | <b>1.3X10<sup>-2</sup></b>     | <b>-1.89</b>                    |

**Table S4:** Total shielding effectiveness at 17.5 GHz.

| <b>Wt. % of MWCNT</b>    | <b>Total Shielding Effectiveness</b> |
|--------------------------|--------------------------------------|
| <b>0.5 wt.% MWCNT/PC</b> | <b>-27.17</b>                        |
| <b>1 wt.% MWCNT/PC</b>   | <b>-14.01</b>                        |
| <b>2 wt.% MWCNT/PC</b>   | <b>-6.24</b>                         |
| <b>5 wt.% MWCNT/PC</b>   | <b>-3.49</b>                         |
| <b>10 wt.% MWCNT/PC</b>  | <b>-2.0</b>                          |
